# Supplementary material for: Ultrahigh efficiency CH4 photocatalytic conversion to C1 liquid products over cheap and vacancy-rich CeO2 at 30 °C
Source: Royal Society of Chemistry journal article supplement (doi:10.1039/d2ta02688k), 2022-01-01
Supplement: d2ta02688k1.pdf [file d2ta02688k1.pdf]

**Ultrahigh efficiency CH<sub>4</sub> photocatalytic conversion to C1 liquid products over cheap and plentiful CeO<sub>2</sub> at 30 °C**

*Hailong Tang<sup>a</sup>, Tangtong Ju<sup>a</sup>, Yue Dai<sup>a</sup>, Meiling Wang<sup>a,\*</sup>, Yongqing Ma<sup>a,b,\*</sup>, Min Wang<sup>c</sup> and Ganhong Zheng<sup>a</sup>*

*<sup>a</sup> School of Materials Science and Engineering, Anhui University, Hefei, 230601, China*

*<sup>b</sup> Institute of Physical Science and Information Technology, Anhui University, Hefei 230601, China*

*<sup>c</sup> School of Physics and optoelectronics engineering, Anhui University, Hefei, 230601, China*

\*To whom correspondence should be addressed.

Tel: (86) 13856996630, E-mail: [mlw@ahu.edu.cn](mailto:mlw@ahu.edu.cn), [yqma@ahu.edu.cn](mailto:yqma@ahu.edu.cn)

**Key words:** CeO<sub>2</sub>, oxygen vacancy, CH<sub>4</sub> conversion, photocatalysis, C1 products

**Fig. S1-S8, Table S1-S4**

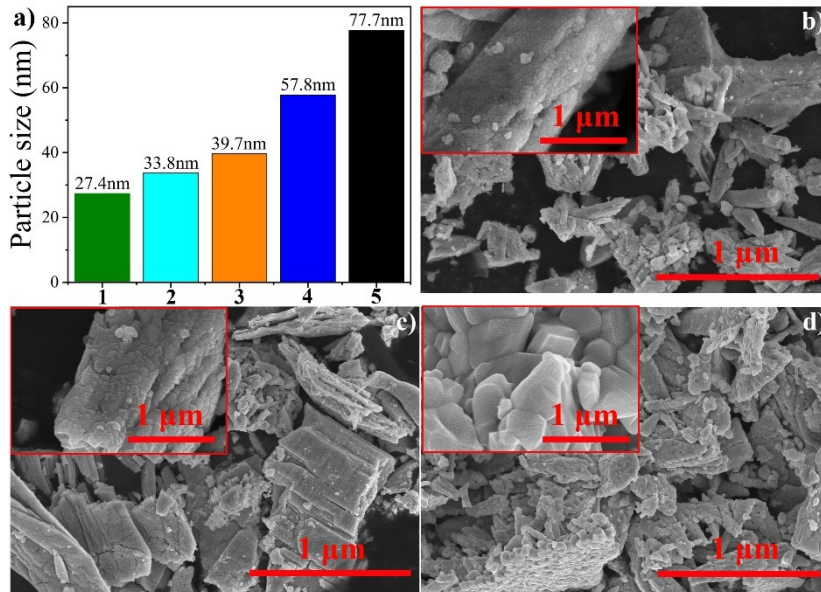

Fig. S1 a) Particle size distributions of different catalysts calculated using Scherrer equation, b-d) Low- and high-magnification SEM images of representative samples.

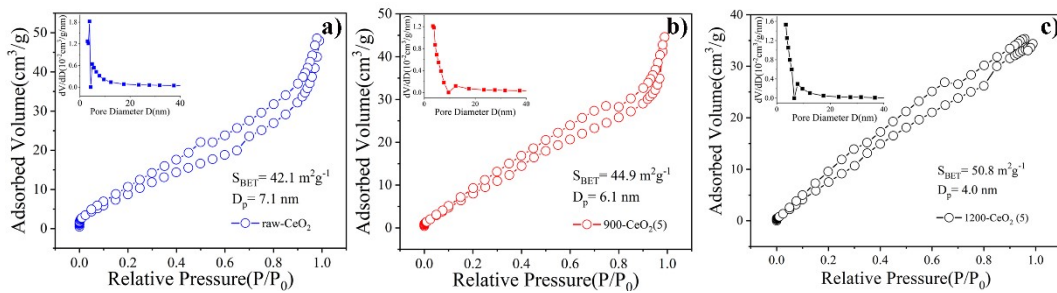

Fig. S2 The nitrogen adsorption-desorption isotherms and pore size distributions of raw-CeO<sub>2</sub>, 900-CeO<sub>2</sub>(5) and 1200-CeO<sub>2</sub>(5) respectively.

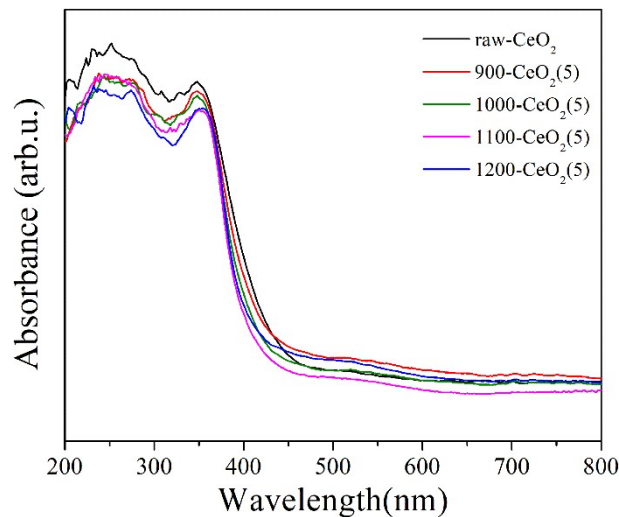

Fig. S3 UV-vis absorption spectra of different samples.

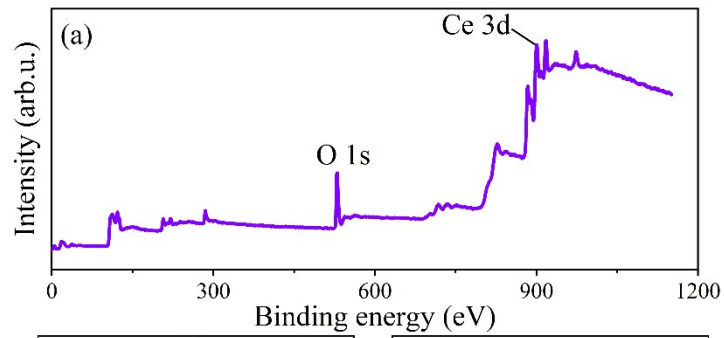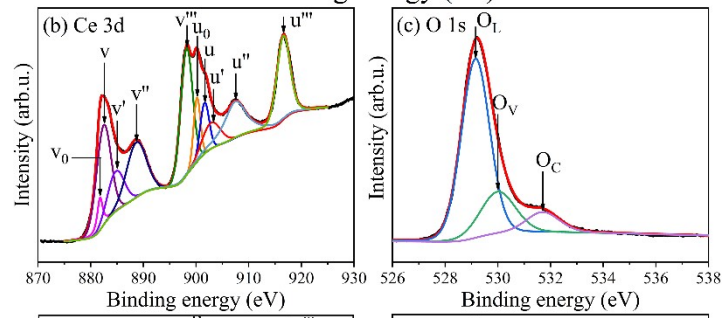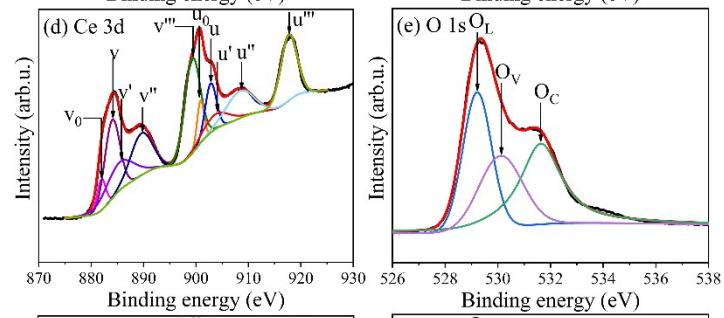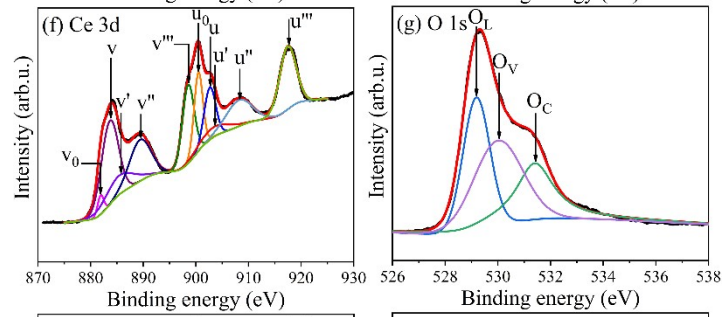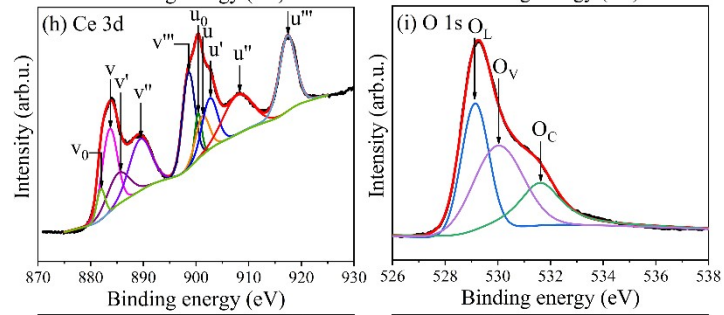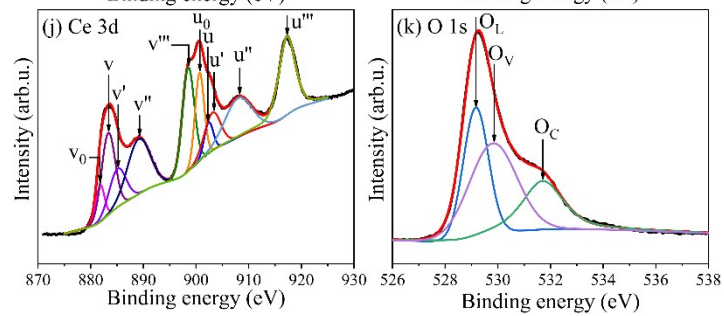

Fig. S4 a) XPS survey spectra of sample 1200-CeO<sub>2</sub>, and high resolution Ce 3d and O 1s XPS spectra of sample b, c) raw-CeO<sub>2</sub>, d, e) 900-CeO<sub>2</sub>(5), f, g) 1000-CeO<sub>2</sub>(5), h, i) 1100- CeO<sub>2</sub>(5) and j, k) 1100- CeO<sub>2</sub>(5) respectively.

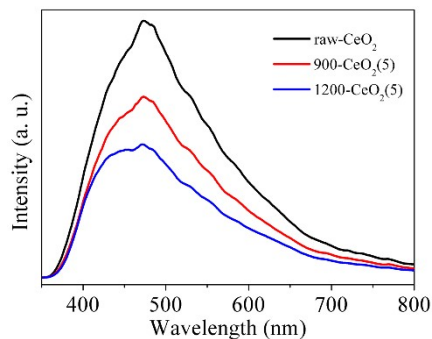

Fig. S5 Photoluminescence spectra of raw-CeO<sub>2</sub>, 900-CeO<sub>2</sub>(5) and 1200-CeO<sub>2</sub>(5).

| Catalyst                              | Main Products                                           | Oxidant                       | Temperature      | Pressure                           | References |
|---------------------------------------|---------------------------------------------------------|-------------------------------|------------------|------------------------------------|------------|
| Fe/TiO <sub>2</sub>                   | alcohol                                                 | H <sub>2</sub> O <sub>2</sub> | Room temperature | Atmospheric pressure               | 17         |
| Cu/C <sub>3</sub> N <sub>4</sub>      | ethanol                                                 | H <sub>2</sub> O              | Room temperature | Atmospheric pressure               | 19         |
| Au-CoO <sub>x</sub> /TiO <sub>2</sub> | CH <sub>3</sub> OOH and CH <sub>3</sub> OH              | O <sub>2</sub>                | 25 °C            | 0.1 MPa O <sub>2</sub> and 2.0 MPa | 21         |
| ZnO nanosheets                        | CH <sub>3</sub> OOH, CH <sub>3</sub> OH, HCHO and HCOOH | H <sub>2</sub> O <sub>2</sub> | 50 °C            | Atmospheric pressure               | 22         |
| CeO <sub>2</sub>                      | ethanol and aldehyde                                    | water                         | 25 °C            | 0.2 MPa                            | 34         |
| IrFe supported on ZSM-5               | CH <sub>3</sub> COOH, CH <sub>3</sub> OH, and HCOOH     | H <sub>2</sub> O <sub>2</sub> | 50 °C            | 3 MPa                              | 41         |

|                            |                                                                        |                                   |              |                             |                 |
|----------------------------|------------------------------------------------------------------------|-----------------------------------|--------------|-----------------------------|-----------------|
| <b>RGO-TiO<sub>2</sub></b> | <b>Aldehyde and acetone</b>                                            | <b>Water vapor</b>                | <b>60 °C</b> | <b>Atmospheric pressure</b> | <b>42</b>       |
| <b>BiOCl</b>               | <b>CH<sub>3</sub>OH</b>                                                | <b>O<sub>2</sub></b>              | <b>40 °C</b> | <b>Normal</b>               | <b>43</b>       |
| <b>CeO<sub>2</sub></b>     | <b>HCHO,<br/>CH<sub>3</sub>OH,<br/>CH<sub>3</sub>OOH and<br/>HCOOH</b> | <b>H<sub>2</sub>O<sub>2</sub></b> | <b>30 °C</b> | <b>2 MPa</b>                | <b>Our work</b> |

Table S1 Catalysts referenced in Fig. 4f and their photocatalytic experimental conditions.

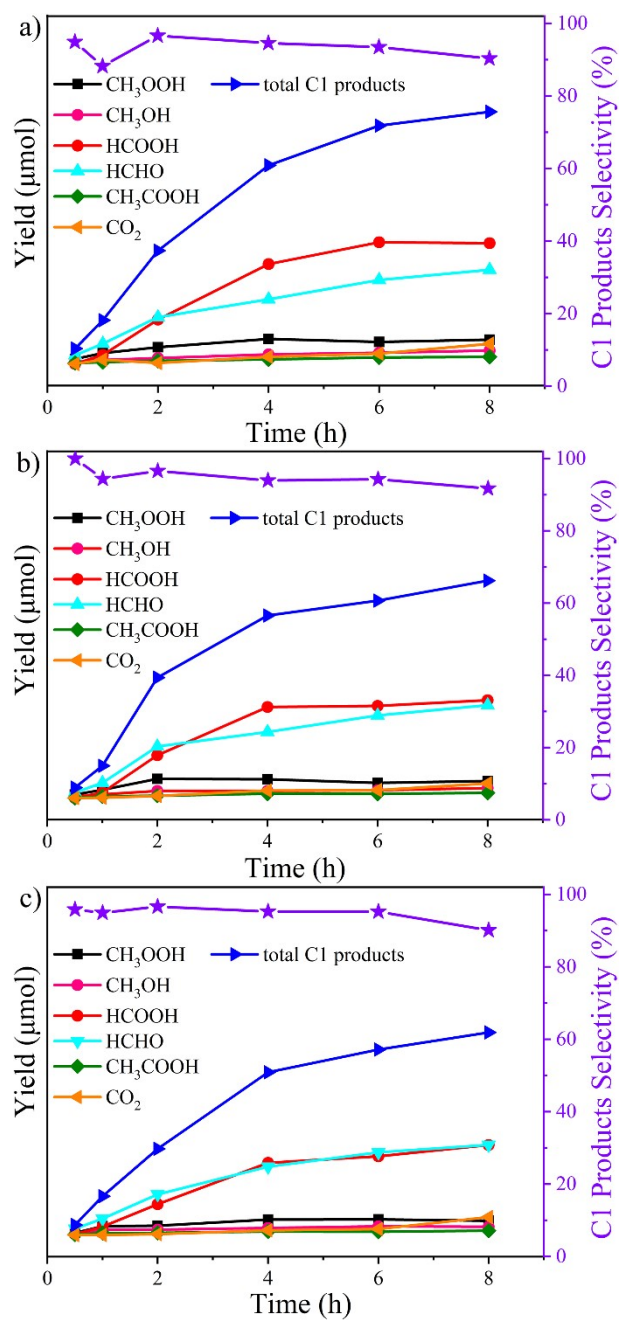

Fig. S6 Different products yields and C1 products selectivity over a) 5 mg, b) 10 mg and c) 20 mg 1200-CeO<sub>2</sub>(5) obtained as a function of photoexcitation time (2 MPa CH<sub>4</sub>, 30 °C, 165 μL H<sub>2</sub>O<sub>2</sub>).

| C1 liquid products | e <sup>-</sup> transferred | C1 selectivity | HCHO and HCOOH selectivity | H <sub>2</sub> O <sub>2</sub> conversion rate | Gain factor |
|--------------------|----------------------------|----------------|----------------------------|-----------------------------------------------|-------------|
| 67.31              | 348.1                      | 1              | 0.92                       | 0.1                                           | 0.39        |

Table S2 Photocatalytic performance of 1200-CeO<sub>2</sub>(5), experimental condition: (20 mg catalyst, 2 MPa CH<sub>4</sub>, 70 °C, 165 μL H<sub>2</sub>O<sub>2</sub>, 2 h).

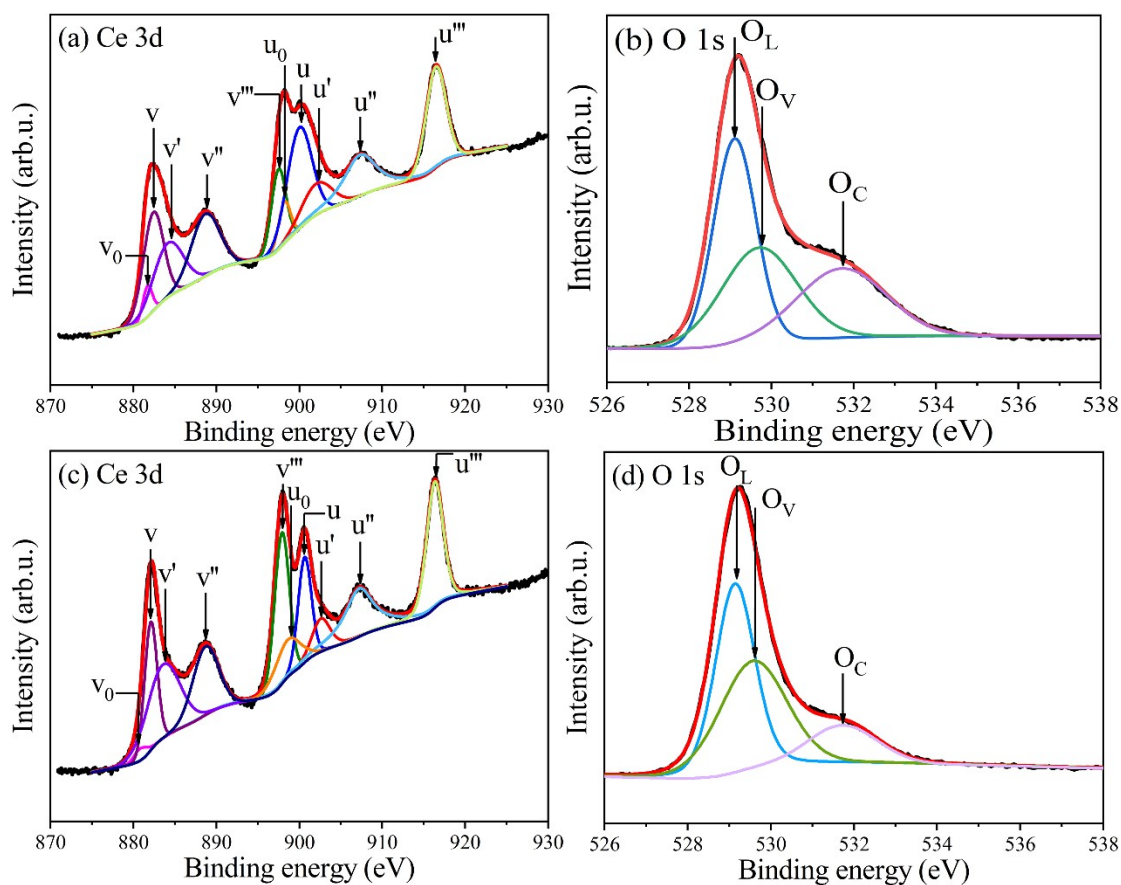

Fig. S7 High resolution Ce 3d and O 1s XPS spectra of sample 1200-CeO<sub>2</sub>(5) a) after photocatalysis and b) regenerated via reannealing treatments.

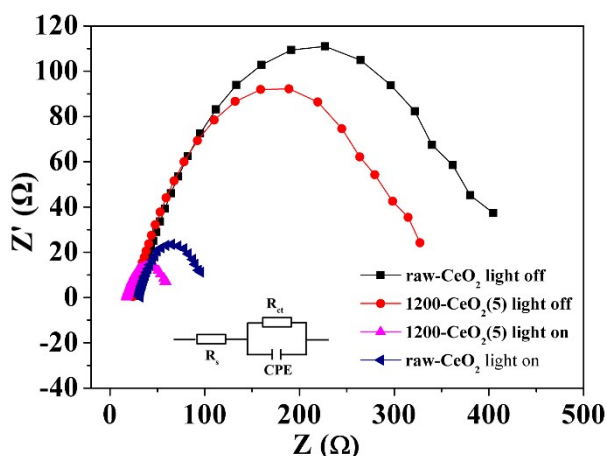

Fig. S8 Electrochemical impedance spectra of raw-CeO<sub>2</sub> and 1200-CeO<sub>2</sub>(5) in 1 M Na<sub>2</sub>SO<sub>4</sub> aqueous solution at 1.8 V vs reversible hydrogen electrode.

|                           |                                                                |                           |
|---------------------------|----------------------------------------------------------------|---------------------------|
| 1200-CeO <sub>2</sub> (5) | Ce <sup>3+</sup> /(Ce <sup>3+</sup> +Ce <sup>4+</sup> )<br>(%) | O <sub>v</sub> ratios (%) |
| After 4th cycle           | 23.13                                                          | 32.83                     |
| Regenerated               | 27.4                                                           | 41.45                     |

Table S3 Ce<sup>3+</sup>/(Ce<sup>3+</sup>+Ce<sup>4+</sup>) and O<sub>v</sub> ratios of 1200-CeO<sub>2</sub>(5) after 4<sup>th</sup> cycle and regeneration via the relative intensity ratios in XPS spectra.

| radical scavengers         | CH <sub>3</sub> OH | HCHO | HCOOH | CH <sub>3</sub> COOH | CH <sub>3</sub> OOH | CO <sub>2</sub> | C1 products |
|----------------------------|--------------------|------|-------|----------------------|---------------------|-----------------|-------------|
| Without radical scavengers | 2.2                | 11.5 | 15.9  | 0.5                  | 4.8                 | 0.5             | 34.9        |
| isopropanol                | 0.7                | 4.1  | 16.9  | 3.6                  | 0.6                 | 0               | 25.9        |
| benzoquinone               | 0                  | 0    | 0     |                      | 0                   | 3.2             | 0           |

Table S4 Yields of C1 products without and with radical scavengers.

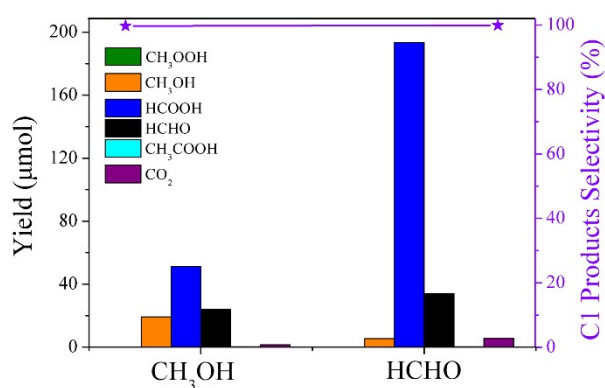

Fig. S9 Yields of various products using CH<sub>3</sub>OH and HCHO as the starting reactants respectively.
